# Supplementary material for: Multifunctional floodplain management and biodiversity effects: a knowledge synthesis for six European countries
Source: Springer Nature journal article supplement (doi:10.1007/s10531-016-1129-3), 2016-05-30
Supplement: MOESM1 [file 10210898]

Stefan Schindler<sup>1,2,\*</sup>, Fionnuala H. O'Neill<sup>3</sup>, Marianna Biró<sup>4</sup>, Christian Damm<sup>5</sup>, Viktor Gasso<sup>6</sup>, Robert Kanka<sup>7</sup>, Theo van der Sluis<sup>8</sup>, Andreas Krug<sup>9</sup>, Sophie G. Lauwaars<sup>10</sup>, Zita Sebesvari<sup>11</sup>, Martin Pusch<sup>12</sup>, Boris Baranovsky<sup>6</sup>, Thomas Ehlert<sup>9</sup>, Bernd Neukirchen<sup>9</sup>, James R. Martin<sup>3</sup>, Katrin Euller<sup>1</sup>, Volker Mauerhofer<sup>13</sup>, Thomas Wrбка<sup>1</sup>

# Multifunctional floodplain management and biodiversity effects: a knowledge synthesis for six European countries

## Affiliations:

- <sup>1</sup> University of Vienna, Department of Botany and Biodiversity Research, Division of Conservation Biology, Vegetation Ecology and Landscape Ecology, Rennweg 14, 1030 Vienna, Austria
- <sup>2</sup> Environment Agency Austria, Department of Biodiversity and Nature Conservation, Spittelauer Lände 5, 1090 Vienna, Austria
- <sup>3</sup> Botanical Environmental & Conservation Consultants Ltd., Dublin, Ireland
- <sup>4</sup> Institute of Ecology and Botany, Centre for Ecological Research, Hungarian Academy of Sciences, Vácrátót, Hungary
- <sup>5</sup> Karlsruhe Institute of Technology (KIT), Karlsruhe, Germany
- <sup>6</sup> Oles Honchar Dnipropetrovsk National University, Dnipropetrovsk, Ukraine
- <sup>7</sup> Institute of Landscape Ecology SAS, Bratislava, Slovakia
- <sup>8</sup> Alterra, Wageningen, The Netherlands
- <sup>9</sup> Federal Agency for Nature Conservation (BfN), Bonn, Germany
- <sup>10</sup> Rijkswaterstaat Centre for Infrastructure, Utrecht, The Netherlands
- <sup>11</sup> United Nations University, Institute for Environment and Human Security, Bonn, Germany
- <sup>12</sup> Leibniz Institute of Freshwater Ecology and Inland Fisheries (IGB), Berlin, Germany
- <sup>13</sup> United Nations University, Institute of Advanced Studies, Yokohama, Japan

## Corresponding author:

[stefan.schindler@umweltbundesamt.at](mailto:stefan.schindler@umweltbundesamt.at)

telephone: 0043 650 5460 5771

## Acknowledgements

This study was partly funded by the European Commission under FP7 as coordination action “biodiversity.knowledge” (Acronym KNEU, Grant No.265299).

## ONLINE RESSOURCE 1

De Blauwe Kamer

[www.rijninbeeld.nl](http://www.rijninbeeld.nl)

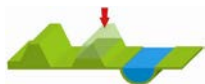

depoldering

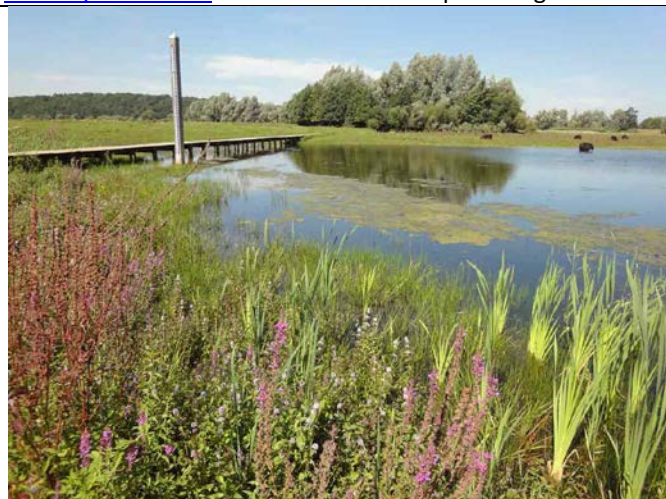

picture: [www.rijninbeeld.nl](http://www.rijninbeeld.nl)

|                          |                                                                                                                                                                                                                                                                                                         |
|--------------------------|---------------------------------------------------------------------------------------------------------------------------------------------------------------------------------------------------------------------------------------------------------------------------------------------------------|
| River branch             | Neder-Rijn (Lower Rhine)                                                                                                                                                                                                                                                                                |
| Province                 | Utrecht / Gelderland                                                                                                                                                                                                                                                                                    |
| Community                | Rhenen                                                                                                                                                                                                                                                                                                  |
| Start nature development | 1984 procurement, 1992 design                                                                                                                                                                                                                                                                           |
| Owner / manager          | UtrechtsLandschap                                                                                                                                                                                                                                                                                       |
| Area                     | 120 ha                                                                                                                                                                                                                                                                                                  |
| Accessibility            | partially accessible on the paths, partially closed                                                                                                                                                                                                                                                     |
| Measures                 | <ul style="list-style-type: none"> <li>• lowering the embankment in two places,</li> <li>• construction of a side channel,</li> <li>• heightening the ground level of the meadow,</li> <li>• construction of an isolated shallow swamp,</li> <li>• construction of an inland drainage system</li> </ul> |

| Species group   | Before nature restoration                                        |                            | After nature restoration |                            | Evaluation development |
|-----------------|------------------------------------------------------------------|----------------------------|--------------------------|----------------------------|------------------------|
|                 | Number of (rare) species                                         | Number of Red List species | Number of (rare) species | Number of Red List species |                        |
| Flora*          | 48-54                                                            | 22-23                      | 50-66                    | 23-25                      |                        |
| Breeding birds* | 36                                                               | ?                          | max 75                   | max 20                     |                        |
| Dragonflies*    | 17-20                                                            | 1                          | 35                       | 4                          |                        |
| Butterflies*    | 24                                                               | 3                          | 24-27                    | 2-3                        |                        |
| Grasshoppers*   | 12                                                               | 1                          | 14                       | 1                          |                        |
| Other species   | Beaver, grass snake, Natterjack toad ( <i>Epidaleacalamita</i> ) |                            |                          |                            |                        |
| * = all species |                                                                  |                            |                          |                            |                        |

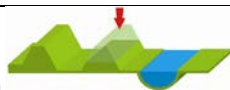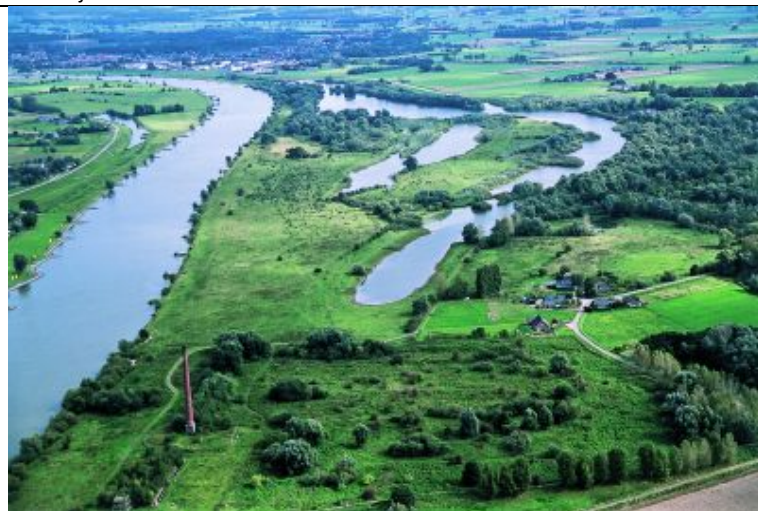

picture: www.synbiosys.alterra.nl

|                          |                                                                                                                                                                                                                                                                                                                                                                                                                                                                                                                                                                                                                                                                                                                                       |
|--------------------------|---------------------------------------------------------------------------------------------------------------------------------------------------------------------------------------------------------------------------------------------------------------------------------------------------------------------------------------------------------------------------------------------------------------------------------------------------------------------------------------------------------------------------------------------------------------------------------------------------------------------------------------------------------------------------------------------------------------------------------------|
| River branch             | IJssel                                                                                                                                                                                                                                                                                                                                                                                                                                                                                                                                                                                                                                                                                                                                |
| Province                 | Overijssel                                                                                                                                                                                                                                                                                                                                                                                                                                                                                                                                                                                                                                                                                                                            |
| Community:               | Olst-Wijhe                                                                                                                                                                                                                                                                                                                                                                                                                                                                                                                                                                                                                                                                                                                            |
| Start nature restoration | 1987 floodplain meadow (grazed), 1989 design                                                                                                                                                                                                                                                                                                                                                                                                                                                                                                                                                                                                                                                                                          |
| Owner / manager          | Staatsbosbeheer                                                                                                                                                                                                                                                                                                                                                                                                                                                                                                                                                                                                                                                                                                                       |
| Area:                    | 150 ha (70 ha grazed)                                                                                                                                                                                                                                                                                                                                                                                                                                                                                                                                                                                                                                                                                                                 |
| Accessibility            | partially accessible                                                                                                                                                                                                                                                                                                                                                                                                                                                                                                                                                                                                                                                                                                                  |
| Measures                 | <ul style="list-style-type: none"> <li>• The construction of a downstream connected channel in 1989;</li> <li>• Part of the sand lake is filled in, part of a floodplain meadow was raised;</li> <li>• Construction of an observation hut from the dyke on the northern side of the ditches (1989); and of an observation tower at the brick factory;</li> <li>• The extension of the ditches in 2006 on the south-west side of the territory (third lob);</li> <li>• The construction of a natural border on the north side of the territory in 2005, by removing the hard riverbank substrate and part of the top layer, a sandy border remains, groynes stayed and there is a construction to restrict access by boats.</li> </ul> |

| Results         | Before nature restoration |                            | After nature restoration |                            | Evaluation development |
|-----------------|---------------------------|----------------------------|--------------------------|----------------------------|------------------------|
| Species group   | Number of (rare) species  | Number of Red List species | Number of (rare) species | Number of Red List species |                        |
| Flora*          | 12-14                     | 7                          | 29                       | 11                         |                        |
| Breeding birds* | 31                        | 12                         | +/-35                    | 11                         |                        |
| Dragonflies*    | ?                         | ?                          | 27-29                    | 5                          |                        |
| Butterflies*    | 19                        | 0                          | 29                       | 4                          |                        |
| Grasshoppers*   | 12                        | 1                          | 13                       | 1                          |                        |
| Fish*           | ?                         | ?                          | 20                       | 4                          |                        |
| Amphibians*     | 6                         | 2                          | 4                        | 0                          |                        |

\* = all species

|          |                           | <b>Leeuwsche Waard</b><br><a href="http://www.rijnbeeld.nl">www.rijnbeeld.nl</a> |                          | excavation of the floodplain topsoil                                                                                                                                                                                                                                                                                                                                                                                                                                                                                 |                        |
|-------------------------------------------------------------------------------------------|---------------------------|----------------------------------------------------------------------------------|--------------------------|----------------------------------------------------------------------------------------------------------------------------------------------------------------------------------------------------------------------------------------------------------------------------------------------------------------------------------------------------------------------------------------------------------------------------------------------------------------------------------------------------------------------|------------------------|
|         |                           | River branch                                                                     |                          | Waal                                                                                                                                                                                                                                                                                                                                                                                                                                                                                                                 |                        |
|                                                                                           |                           | Province                                                                         |                          | Gelderland                                                                                                                                                                                                                                                                                                                                                                                                                                                                                                           |                        |
|                                                                                           |                           | Community:                                                                       |                          | Druten                                                                                                                                                                                                                                                                                                                                                                                                                                                                                                               |                        |
|                                                                                           |                           | Start nature development                                                         |                          | 1994                                                                                                                                                                                                                                                                                                                                                                                                                                                                                                                 |                        |
|                                                                                           |                           | Owner / manager                                                                  |                          | Dekker van de Kamp                                                                                                                                                                                                                                                                                                                                                                                                                                                                                                   |                        |
|                                                                                           |                           | Area:                                                                            |                          | About 115 ha (sand lake included)                                                                                                                                                                                                                                                                                                                                                                                                                                                                                    |                        |
|                                                                                           |                           | Accessibility                                                                    |                          | partially free accessible (western part), the eastern part is closed                                                                                                                                                                                                                                                                                                                                                                                                                                                 |                        |
|                                                                                           |                           | Measures                                                                         |                          | <ul style="list-style-type: none"> <li>• End of 2003: first phase filling up the Kaliwaal;</li> <li>• 2003: north eastern side a temporary quay is constructed;</li> <li>• 2003: Lowering a large part of the space between the shore and the summer dyke;</li> <li>• 2008: Realisation of a large oxbow around the Kaliwaal;</li> <li>• 2008: Elongating the quay along the south side of the Kaliwaal to the Leeuwsche Waard;</li> <li>• 2008: Construction of a new quay on the dyke side of the oxbow</li> </ul> |                        |
| Picture of the Leeuwsche Waard ( <a href="http://www.rijnbeeld.nl">www.rijnbeeld.nl</a> ) |                           |                                                                                  |                          |                                                                                                                                                                                                                                                                                                                                                                                                                                                                                                                      |                        |
| Species group                                                                             | Before nature restoration |                                                                                  | After nature restoration |                                                                                                                                                                                                                                                                                                                                                                                                                                                                                                                      | Evaluation development |
|                                                                                           | Number of (rare) species  | Number of Red List species                                                       | Number of (rare) species | Number of Red List species                                                                                                                                                                                                                                                                                                                                                                                                                                                                                           |                        |
| Flora*                                                                                    | 18                        | 5                                                                                | 32-41                    | 10                                                                                                                                                                                                                                                                                                                                                                                                                                                                                                                   |                        |
| Breeding birds*                                                                           |                           |                                                                                  |                          |                                                                                                                                                                                                                                                                                                                                                                                                                                                                                                                      |                        |
| Dragon flies*                                                                             | 18                        | 0                                                                                | 18                       | 2                                                                                                                                                                                                                                                                                                                                                                                                                                                                                                                    |                        |
| Butterflies*                                                                              |                           |                                                                                  | 17                       | 1                                                                                                                                                                                                                                                                                                                                                                                                                                                                                                                    |                        |
| Grasshoppers*                                                                             | 7                         | 0                                                                                | 10-11                    | 1                                                                                                                                                                                                                                                                                                                                                                                                                                                                                                                    |                        |
| Other species                                                                             |                           |                                                                                  |                          |                                                                                                                                                                                                                                                                                                                                                                                                                                                                                                                      |                        |
| * = all species                                                                           |                           |                                                                                  |                          |                                                                                                                                                                                                                                                                                                                                                                                                                                                                                                                      |                        |

|                                                                                                                                                                                                                                                 |                                                                                                                                                                                                                                                                                                                                                                                                                                                                                                                                                                                                                                                                                                                                                                                                                                                                                                                                      |              |       |          |               |            |         |                          |                                              |                 |                                                      |       |                      |               |                                |          |                                                                                                                                                                                                                                                                                                                                                                                               |  |
|-------------------------------------------------------------------------------------------------------------------------------------------------------------------------------------------------------------------------------------------------|--------------------------------------------------------------------------------------------------------------------------------------------------------------------------------------------------------------------------------------------------------------------------------------------------------------------------------------------------------------------------------------------------------------------------------------------------------------------------------------------------------------------------------------------------------------------------------------------------------------------------------------------------------------------------------------------------------------------------------------------------------------------------------------------------------------------------------------------------------------------------------------------------------------------------------------|--------------|-------|----------|---------------|------------|---------|--------------------------|----------------------------------------------|-----------------|------------------------------------------------------|-------|----------------------|---------------|--------------------------------|----------|-----------------------------------------------------------------------------------------------------------------------------------------------------------------------------------------------------------------------------------------------------------------------------------------------------------------------------------------------------------------------------------------------|--|
|  <p><b>Oeffeltermeent</b><br/>(<a href="http://maasinbeeld.nl/2/?cat=36">http://maasinbeeld.nl/2/?cat=36</a>)</p> <p>Excavation of the floodplain top soil</p> |  <p>Relocation of the dyke</p>                                                                                                                                                                                                                                                                                                                                                                                                                                                                                                                                                                                                                                                                                                                                                                                                                    |              |       |          |               |            |         |                          |                                              |                 |                                                      |       |                      |               |                                |          |                                                                                                                                                                                                                                                                                                                                                                                               |  |
|                                                                                                                                                                | <table border="1"> <tr><td>River branch</td><td>Meuse</td></tr> <tr><td>Province</td><td>Noord-Brabant</td></tr> <tr><td>Community:</td><td>Boxmeer</td></tr> <tr><td>Start nature restoration</td><td>1982 floodplain meadow (grazed), 1989 design</td></tr> <tr><td>Owner / manager</td><td>State Forestry Service/Gravel exploitation companies</td></tr> <tr><td>Area:</td><td>100 ha (most grazed)</td></tr> <tr><td>Accessibility</td><td>accessible on public footpaths</td></tr> <tr><td>Measures</td><td> <ul style="list-style-type: none"> <li>• Construction of a summer dyke, to avoid flooding of rare and valuable floodplain meadows (early 80s)</li> <li>• Excavation of livestock ponds as part of nature restoration (early 90s);</li> <li>• Removal top soil to restore ruderal conditions in part of the area (1991);</li> <li>• Reconstruction and strengthening of river dyke.</li> </ul> </td></tr> </table> | River branch | Meuse | Province | Noord-Brabant | Community: | Boxmeer | Start nature restoration | 1982 floodplain meadow (grazed), 1989 design | Owner / manager | State Forestry Service/Gravel exploitation companies | Area: | 100 ha (most grazed) | Accessibility | accessible on public footpaths | Measures | <ul style="list-style-type: none"> <li>• Construction of a summer dyke, to avoid flooding of rare and valuable floodplain meadows (early 80s)</li> <li>• Excavation of livestock ponds as part of nature restoration (early 90s);</li> <li>• Removal top soil to restore ruderal conditions in part of the area (1991);</li> <li>• Reconstruction and strengthening of river dyke.</li> </ul> |  |
| River branch                                                                                                                                                                                                                                    | Meuse                                                                                                                                                                                                                                                                                                                                                                                                                                                                                                                                                                                                                                                                                                                                                                                                                                                                                                                                |              |       |          |               |            |         |                          |                                              |                 |                                                      |       |                      |               |                                |          |                                                                                                                                                                                                                                                                                                                                                                                               |  |
| Province                                                                                                                                                                                                                                        | Noord-Brabant                                                                                                                                                                                                                                                                                                                                                                                                                                                                                                                                                                                                                                                                                                                                                                                                                                                                                                                        |              |       |          |               |            |         |                          |                                              |                 |                                                      |       |                      |               |                                |          |                                                                                                                                                                                                                                                                                                                                                                                               |  |
| Community:                                                                                                                                                                                                                                      | Boxmeer                                                                                                                                                                                                                                                                                                                                                                                                                                                                                                                                                                                                                                                                                                                                                                                                                                                                                                                              |              |       |          |               |            |         |                          |                                              |                 |                                                      |       |                      |               |                                |          |                                                                                                                                                                                                                                                                                                                                                                                               |  |
| Start nature restoration                                                                                                                                                                                                                        | 1982 floodplain meadow (grazed), 1989 design                                                                                                                                                                                                                                                                                                                                                                                                                                                                                                                                                                                                                                                                                                                                                                                                                                                                                         |              |       |          |               |            |         |                          |                                              |                 |                                                      |       |                      |               |                                |          |                                                                                                                                                                                                                                                                                                                                                                                               |  |
| Owner / manager                                                                                                                                                                                                                                 | State Forestry Service/Gravel exploitation companies                                                                                                                                                                                                                                                                                                                                                                                                                                                                                                                                                                                                                                                                                                                                                                                                                                                                                 |              |       |          |               |            |         |                          |                                              |                 |                                                      |       |                      |               |                                |          |                                                                                                                                                                                                                                                                                                                                                                                               |  |
| Area:                                                                                                                                                                                                                                           | 100 ha (most grazed)                                                                                                                                                                                                                                                                                                                                                                                                                                                                                                                                                                                                                                                                                                                                                                                                                                                                                                                 |              |       |          |               |            |         |                          |                                              |                 |                                                      |       |                      |               |                                |          |                                                                                                                                                                                                                                                                                                                                                                                               |  |
| Accessibility                                                                                                                                                                                                                                   | accessible on public footpaths                                                                                                                                                                                                                                                                                                                                                                                                                                                                                                                                                                                                                                                                                                                                                                                                                                                                                                       |              |       |          |               |            |         |                          |                                              |                 |                                                      |       |                      |               |                                |          |                                                                                                                                                                                                                                                                                                                                                                                               |  |
| Measures                                                                                                                                                                                                                                        | <ul style="list-style-type: none"> <li>• Construction of a summer dyke, to avoid flooding of rare and valuable floodplain meadows (early 80s)</li> <li>• Excavation of livestock ponds as part of nature restoration (early 90s);</li> <li>• Removal top soil to restore ruderal conditions in part of the area (1991);</li> <li>• Reconstruction and strengthening of river dyke.</li> </ul>                                                                                                                                                                                                                                                                                                                                                                                                                                                                                                                                        |              |       |          |               |            |         |                          |                                              |                 |                                                      |       |                      |               |                                |          |                                                                                                                                                                                                                                                                                                                                                                                               |  |

## Results

| Species group  | Before nature restoration |                            | After nature restoration |                            | Evaluation development |
|----------------|---------------------------|----------------------------|--------------------------|----------------------------|------------------------|
|                | Number of (rare) species  | Number of Red List species | Number of (rare) species | Number of Red List species |                        |
| Flora*         | 41                        | 26                         | 36                       | 20                         |                        |
| Breeding birds | 22                        | 12                         | 22                       | 9                          |                        |
| Dragonflies*   | ?                         | ?                          | 15                       | 2                          |                        |
| Butterflies*   | ?                         | ?                          | 23                       | 2                          |                        |
| Grasshoppers*  | ?                         | ?                          | 8                        | 0                          |                        |
| Fish           |                           |                            |                          |                            |                        |
| Herpetofauna   |                           | 0                          | 6                        | 2                          |                        |

\* = all species

| Process parameter    | change |
|----------------------|--------|
| Natural development  |        |
| Hydro-morphodynamics |        |
| Natural grazing      |        |
| Seepage              |        |

|                                                                                                                                                                                             |                          |                                                                                                                                                                                                                                                                                                                                                                   |  |
|---------------------------------------------------------------------------------------------------------------------------------------------------------------------------------------------|--------------------------|-------------------------------------------------------------------------------------------------------------------------------------------------------------------------------------------------------------------------------------------------------------------------------------------------------------------------------------------------------------------|--|
| <b>Pilot project Meers</b><br><a href="http://www.maasinbeeld.nl/publicaties/ProefprojectMeers.pdf">http://www.maasinbeeld.nl/publicaties/ProefprojectMeers.pdf</a><br>(Peters et al. 2007) |                          |                                                                                                                                                                                                                                                                                                                                                                   |  |
|                                                                                                            | River branch             | Meuse                                                                                                                                                                                                                                                                                                                                                             |  |
|                                                                                                                                                                                             | Province                 | Limburg                                                                                                                                                                                                                                                                                                                                                           |  |
|                                                                                                                                                                                             | Community:               | Stein                                                                                                                                                                                                                                                                                                                                                             |  |
|                                                                                                                                                                                             | Start nature restoration | 1998                                                                                                                                                                                                                                                                                                                                                              |  |
|                                                                                                                                                                                             | Owner / manager          | Natuurmonumenten (NGO), mineral extraction company                                                                                                                                                                                                                                                                                                                |  |
|                                                                                                                                                                                             | Area:                    | 53 ha (grazed)                                                                                                                                                                                                                                                                                                                                                    |  |
|                                                                                                                                                                                             | Accessibility            | accessible                                                                                                                                                                                                                                                                                                                                                        |  |
|                                                                                                                                                                                             | Measures                 | <ul style="list-style-type: none"> <li>• Widening riverbed over 200m, lowering river bank</li> <li>• (Partly) Filling in deep gravel pit (lake)</li> <li>• Landscaping of the gravel pits</li> <li>• Establishment recreation facilities</li> <li>• Establishing one grazed management unit</li> <li>• Construction shallow gravel channel along river</li> </ul> |  |

## Results

| Species group  | Before nature restoration |                            | After nature restoration |                            | Evaluation development                         |
|----------------|---------------------------|----------------------------|--------------------------|----------------------------|------------------------------------------------|
|                | Number of (rare) species  | Number of Red List species | Number of (rare) species | Number of Red List species |                                                |
| Flora*         | 28                        | 12                         | 57                       | 30                         |                                                |
| Breeding birds | 13-15                     | 8-11                       | 13-17                    | 8-10                       |                                                |
| Dragonflies*   | ?*                        | 0                          | 22*                      | 2                          |                                                |
| Butterflies*   | 10*                       | 1                          | 15*                      | 3                          |                                                |
| Bats*          | ?                         | ?                          | 3*                       | 3                          |                                                |
| Other species  |                           |                            |                          |                            | Beaver, Blue-winged grasshopper                |
| Fish           |                           |                            |                          |                            | Many important rheophile fish species returned |

| Process parameter    | change |
|----------------------|--------|
| Natural development  |        |
| Hydro-morphodynamics |        |
| Natural grazing      |        |
| Other processes      |        |
